# Supplementary material for: Statistical image processing quantifies the changes in cytoplasmic texture associated with aging in Caenorhabditis elegans oocytes
Source: Springer Nature journal article supplement (doi:10.1186/s12859-021-03990-3), 2021-02-17

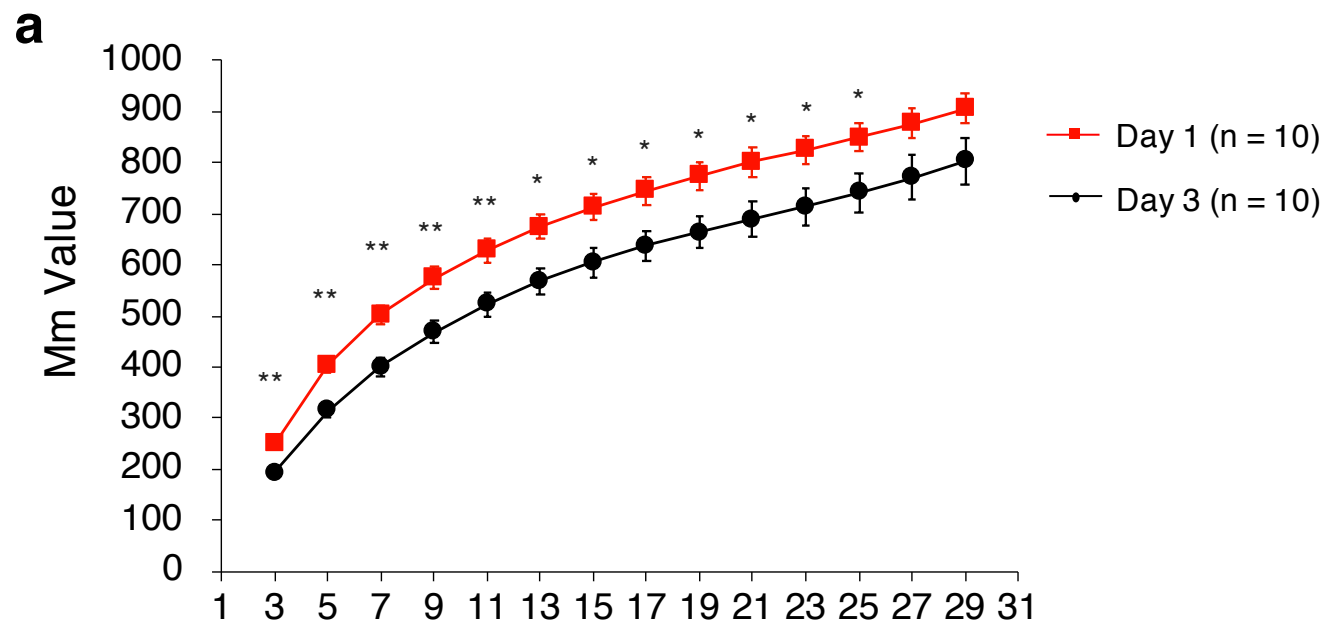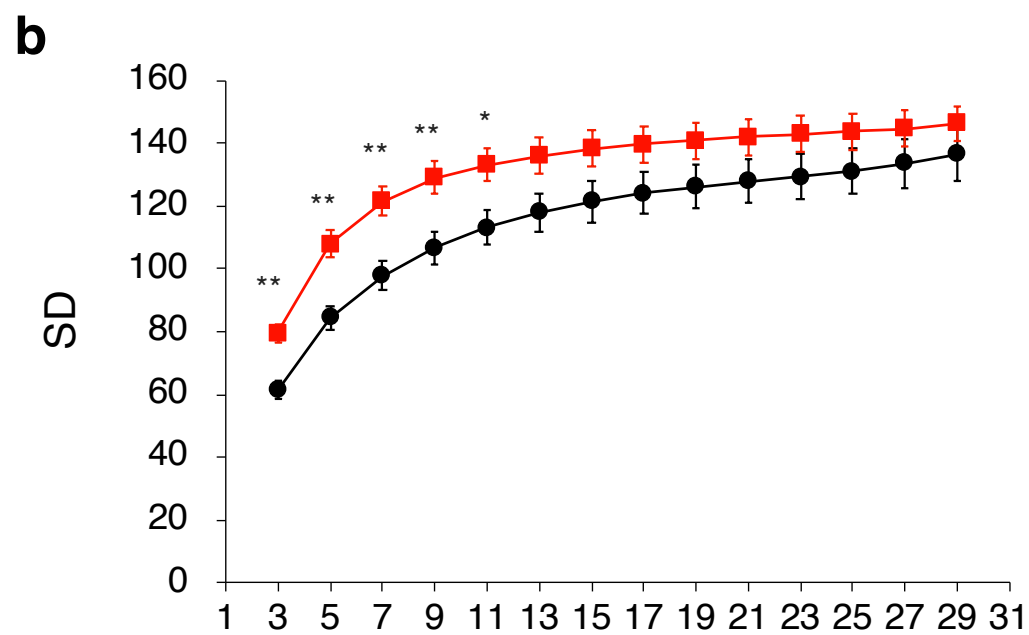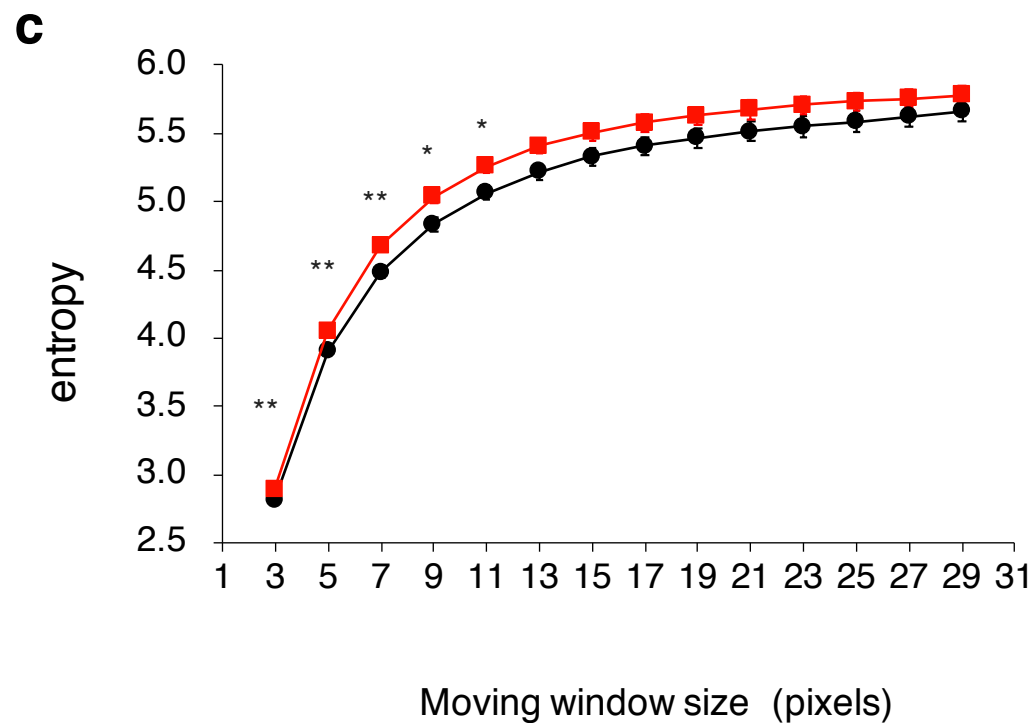

Supplement: 12859_2021_3990_MOESM5_ESM.pdf [file 12859_2021_3990_MOESM5_ESM.pdf]
